# Supplementary material
Source: PubMed Central journal article supplement (PMC7551710)
Supplement: pt0c00108_si_001.pdf [file pt0c00108_si_001.pdf]

## **Identification of SARS-CoV-2 3CL Protease Inhibitors by a Quantitative High-throughput Screening**

Wei Zhu, Miao Xu, Catherine Z. Chen, Hui Guo, Min Shen, Xin Hu, Paul Shinn, Carleen Klumpp-Thomas, Samuel G. Michael, Wei Zheng\*

National Center for Advancing Translational Sciences, National Institutes of Health, Rockville, MD 20850, USA

### **Supplementary Information**

#### **Table of Contents**

- **Figure S-1** Triage strategy used to screen compounds (pg. S-2)
- **Figure S-2.** Standard curve for counter screen (pg. S-3)
- **Figure S-3.** Concentration-response curves of identified compounds by 3CL<sup>pro</sup> assay (pg. S-4)
- **Figure S-4.** Concentration-response curves of compounds showed apparent quenching effect in counter screen. (pg. S-5)

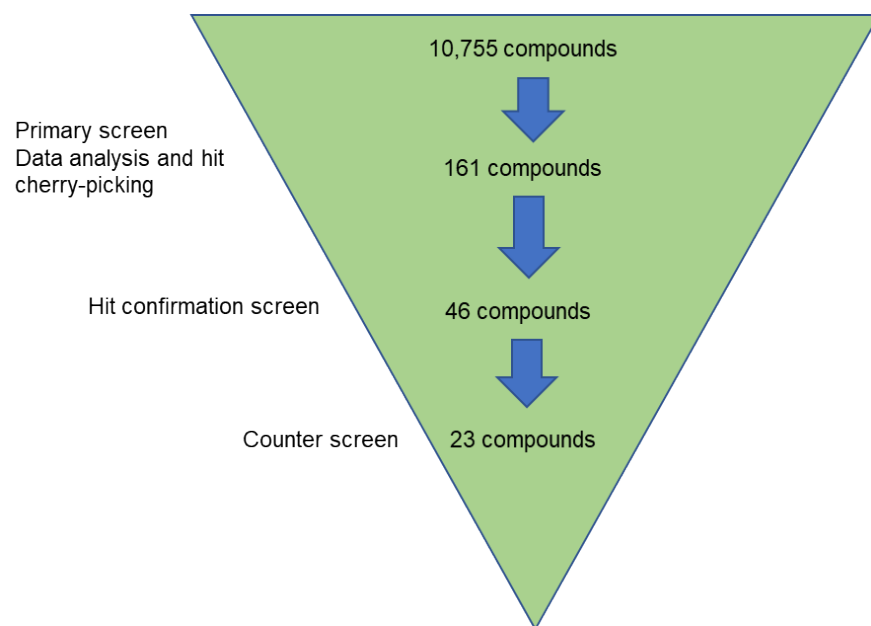

**Figure S-1.** Triage strategy used to narrow down the starting 10,755 small molecules from the primary HTS campaign which led to the identification of 23 compounds having  $IC_{50}s < 30 \mu M$ , maximal inhibition  $> 60\%$  against SARS-CoV-2 3CL<sup>pro</sup>.

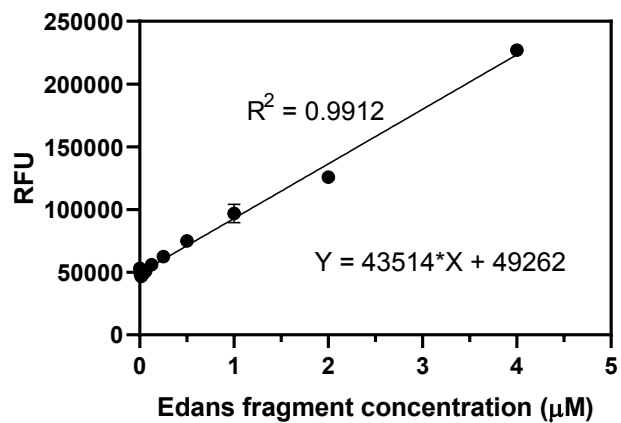

**Figure S-2.** Standard curve generated by diluting SGFRKME-Edans (fluorescent fragment in assay byproducts) in 20 µM substrate solution. The relative fluorescent unit (RFU) is linearly proportional to the amount of SGFRKME-Edans.

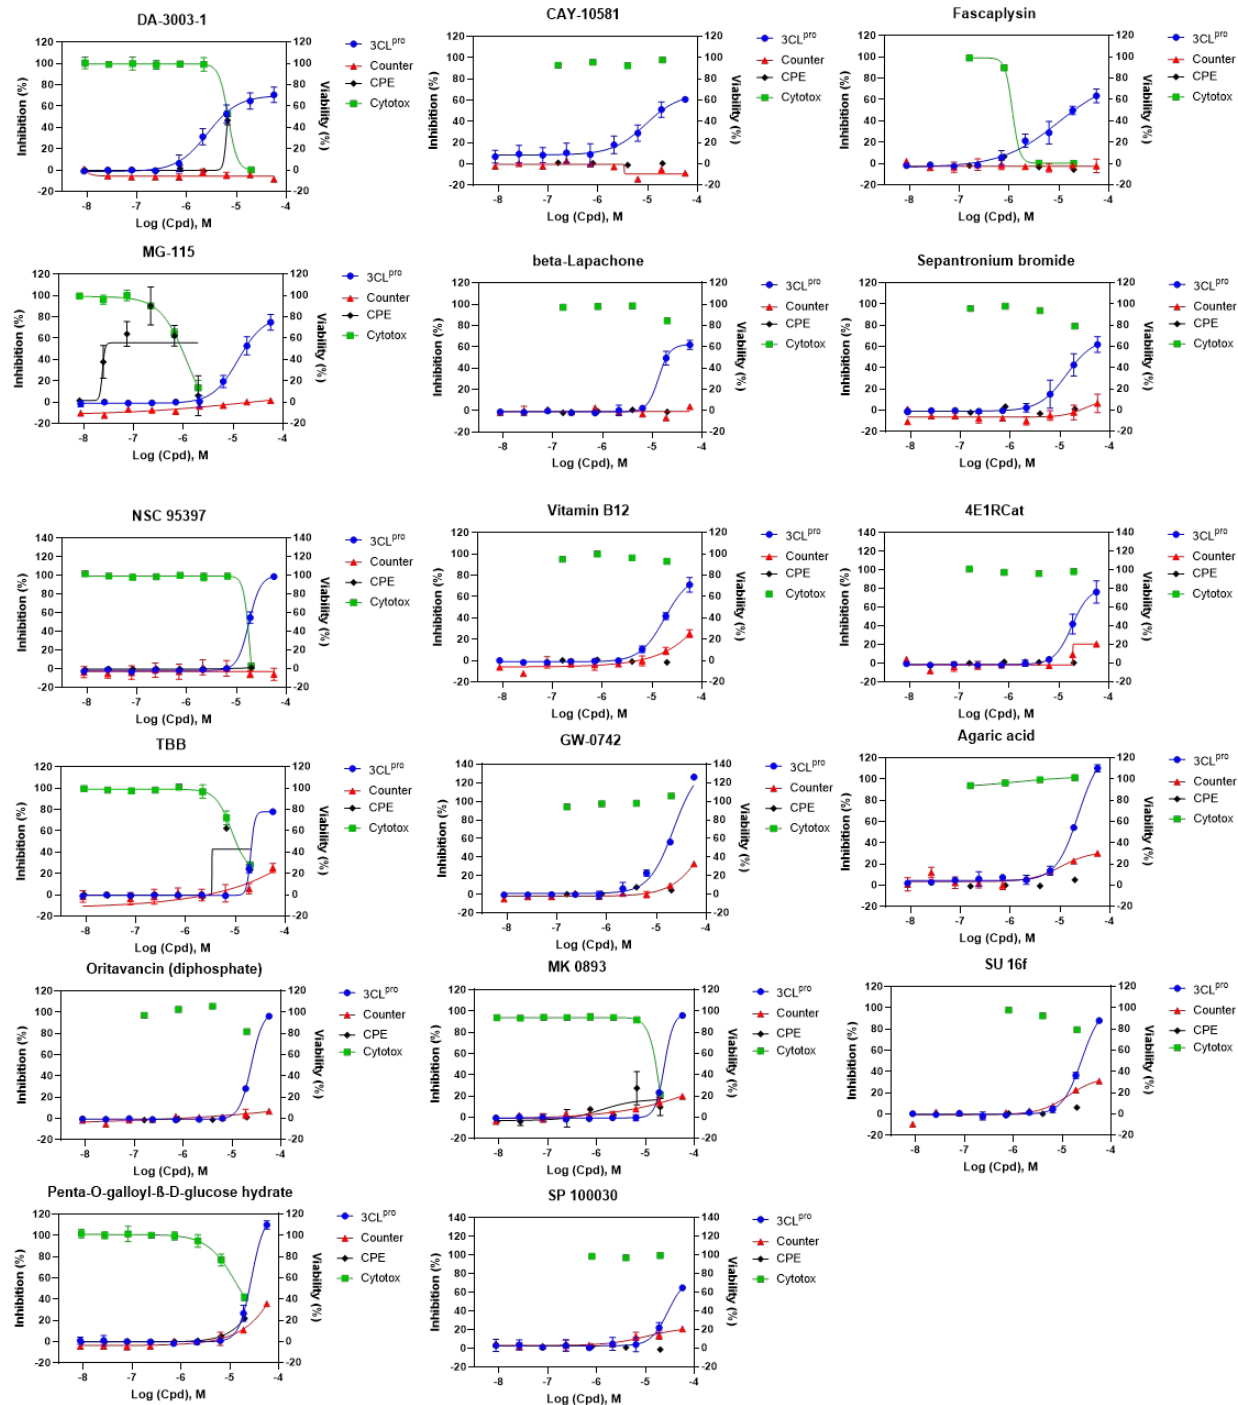

**Figure S-3.** Concentration-response curves of identified compounds by 3CL<sup>pro</sup> assay. These compounds showed relatively negligible quenching effect relative to enzyme inhibitory activity.

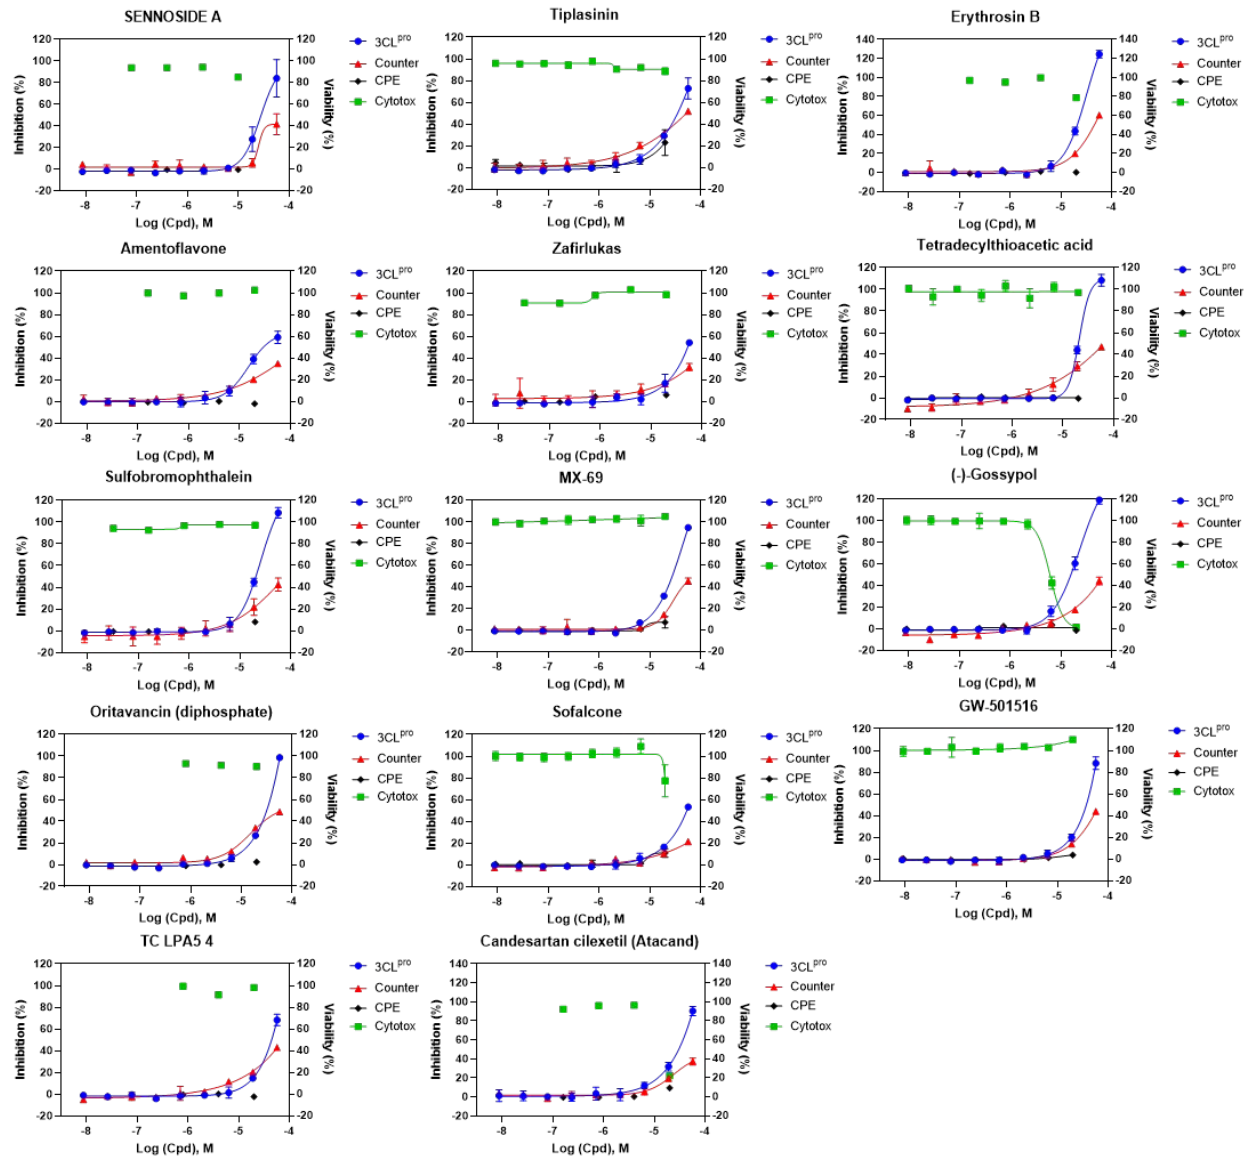

**Figure S-4.** Concentration-response curves of compounds showed apparent quenching effect in counter screen.
